# Supplementary material
Source: publisher figshare collection journal article supplement (https://geolsoc.figshare.com/articles/dataset/_/3454133)
Supplement: Supplementary file 1 [file 1]

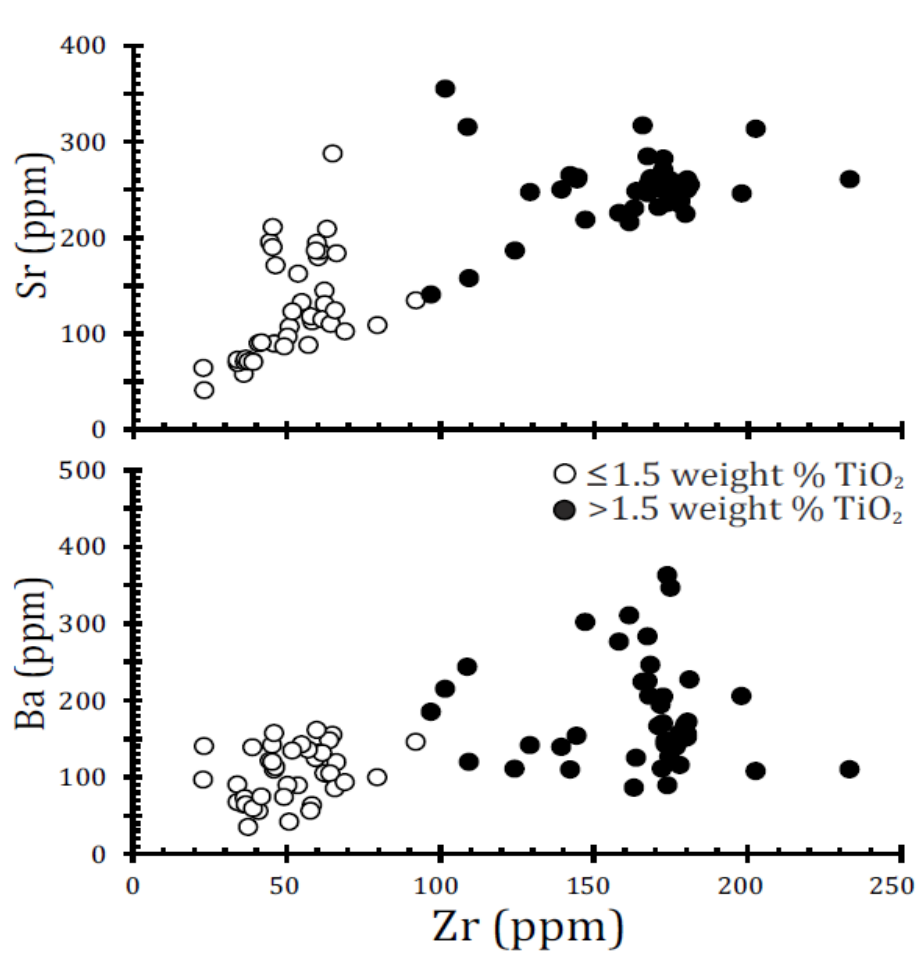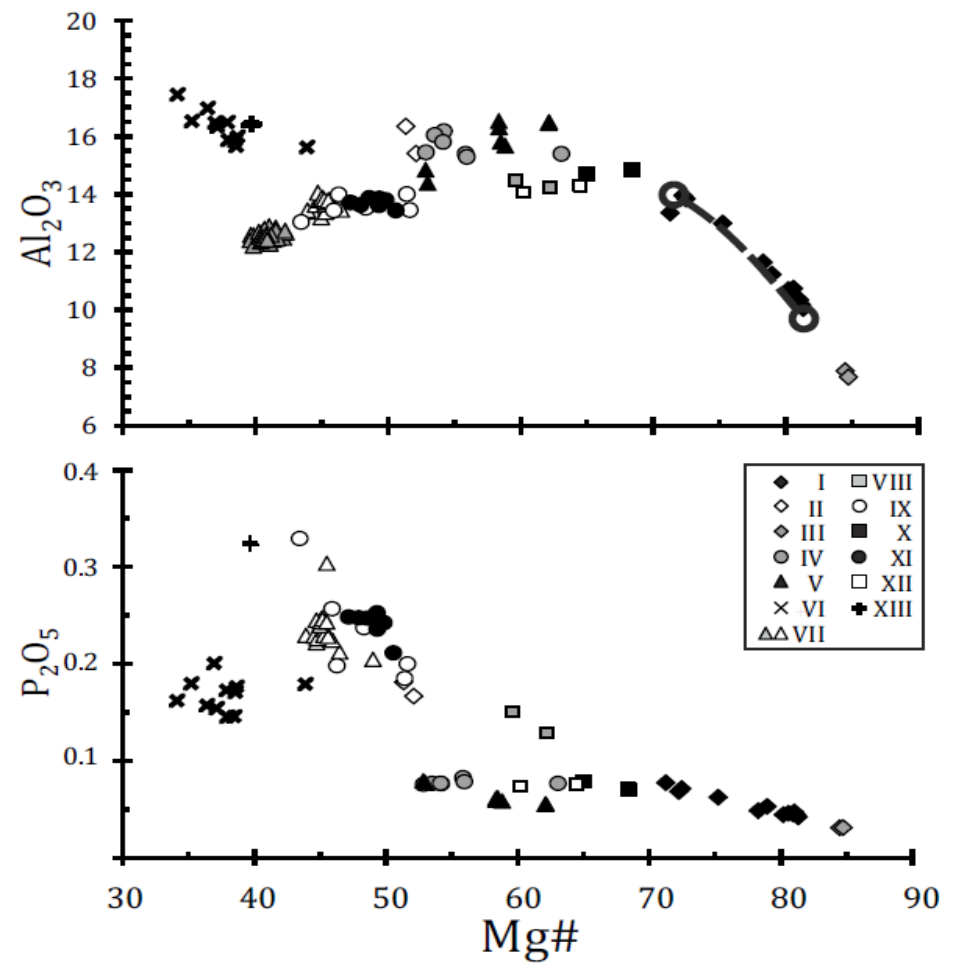

Additional chemical cross-plots for Ba and Sr versus Zr along with  $\text{Al}_2\text{O}_3$  and  $\text{P}_2\text{O}_5$  versus Mg# for the Lagavulin well.
