# Supplementary material
Source: publisher figshare collection journal article supplement (https://geolsoc.figshare.com/articles/dataset/_/3454133)
Supplement: Supplementary file 2 [file 1]

PRIMELT3 (Herzberg & Asimow 2015) solutions for primary magmas from Lagavulin.

|                                    |             |             |             |                                                                              |
|------------------------------------|-------------|-------------|-------------|------------------------------------------------------------------------------|
| <b>Sample</b>                      | 14300       | 13370       | 13430       |                                                                              |
| <b>SiO<sub>2</sub></b>             | 44.43       | 46.95       | 47.01       |                                                                              |
| <b>TiO<sub>2</sub></b>             | 0.64        | 1.08        | 0.93        |                                                                              |
| <b>Al<sub>2</sub>O<sub>3</sub></b> | 10.70       | 15.39       | 16.01       |                                                                              |
| <b>FeO</b>                         | 10.14       | 10.61       | 10.36       | (total Fe as FeO)                                                            |
| <b>MnO</b>                         | 0.17        | 0.18        | 0.18        |                                                                              |
| <b>MgO</b>                         | 23.04       | 10.16       | 8.82        |                                                                              |
| <b>CaO</b>                         | 8.10        | 12.20       | 12.86       |                                                                              |
| <b>Na<sub>2</sub>O</b>             | 0.73        | 1.85        | 1.95        |                                                                              |
| <b>K<sub>2</sub>O</b>              | 0.70        | 0.16        | 0.33        |                                                                              |
| <b>P<sub>2</sub>O<sub>5</sub></b>  | 0.04        | 0.08        | 0.06        |                                                                              |
| <b>% Ol</b>                        | -14.78      | 25.03       | 27.54       | (% of olivine added or subtracted)                                           |
| <b>SiO<sub>2</sub></b>             | 45.62       | 46.01       | 45.96       |                                                                              |
| <b>TiO<sub>2</sub></b>             | 0.75        | 0.86        | 0.72        |                                                                              |
| <b>Al<sub>2</sub>O<sub>3</sub></b> | 12.53       | 12.19       | 12.38       |                                                                              |
| <b>Fe<sub>2</sub>O<sub>3</sub></b> | 0.37        | 0.43        | 0.36        | Fe <sub>2</sub> O <sub>3</sub> /TiO <sub>2</sub> =0.5 assumed for all sample |
| <b>FeO</b>                         | 10.44       | 10.33       | 10.35       |                                                                              |
| <b>MnO</b>                         | 0.18        | 0.18        | 0.18        |                                                                              |
| <b>MgO</b>                         | 18.90       | 18.66       | 18.25       |                                                                              |
| <b>CaO</b>                         | 9.48        | 9.70        | 9.99        |                                                                              |
| <b>Na<sub>2</sub>O</b>             | 0.85        | 1.46        | 1.51        |                                                                              |
| <b>K<sub>2</sub>O</b>              | 0.82        | 0.13        | 0.25        |                                                                              |
| <b>P<sub>2</sub>O<sub>5</sub></b>  | 0.05        | 0.06        | 0.05        |                                                                              |
| <b>Tol</b>                         | 1415        | 1411        | 1405        | (T at 0GPa)                                                                  |
| <b>T<sub>p</sub> °C</b>            | <b>1536</b> | <b>1529</b> | <b>1519</b> |                                                                              |
| <b>k<sub>D</sub> Fe-Mg</b>         | 0.296       | 0.297       | 0.296       |                                                                              |
| <b>Xfo</b>                         | 0.916       | 0.916       | 0.914       | (olivine Fo content)                                                         |
| <b>F (AFM)</b>                     | 0.178       | 0.176       | 0.132       | (F for accumulated melt-fraction)                                            |

| Residual Mineralogy | Gt Peridotite | Gt Peridotite | Gt Peridotite |                                                                  |
|---------------------|---------------|---------------|---------------|------------------------------------------------------------------|
| <b>Pi GPa</b>       | 4.2           | 4.1           | 3.9           | (Initial pressure of intersection of the dry peridotite solidus) |
| <b>Pf GPa</b>       | 3.1           | 2.9           | 3.1           | (Final pressure of melting)                                      |

Herzberg, C. & Gazel, E. 2009. Petrological evidence for secular cooling in mantle plumes. *Nature*, 458, 619–623.

Herzberg, C. & Asimow, P.D. 2015. PRIMELT3 MEGA.XLSM software for primary magma calculation: Peridotite primary magma MgO contents from the liquidus to the solidus. Technical Reports: methods, *Geochemistry, Geophysics, Geosystems* , **16**, 563-578.

Hole, MJ., Millett, J., Jolley, DW. & Rogers, N. 2015. Rifting and Mafic Magmatism in the Hebridean Basins. *Journal of the Geological Society, London* , online first.

Putirka, K.D., Perfit, M., Ryerson, F.J. & Jackson, M.G. 2007. Ambient and excess mantle temperatures, olivine thermometry, and active vs. passive upwelling. *Chemical Geology* , **24**, 177-206.

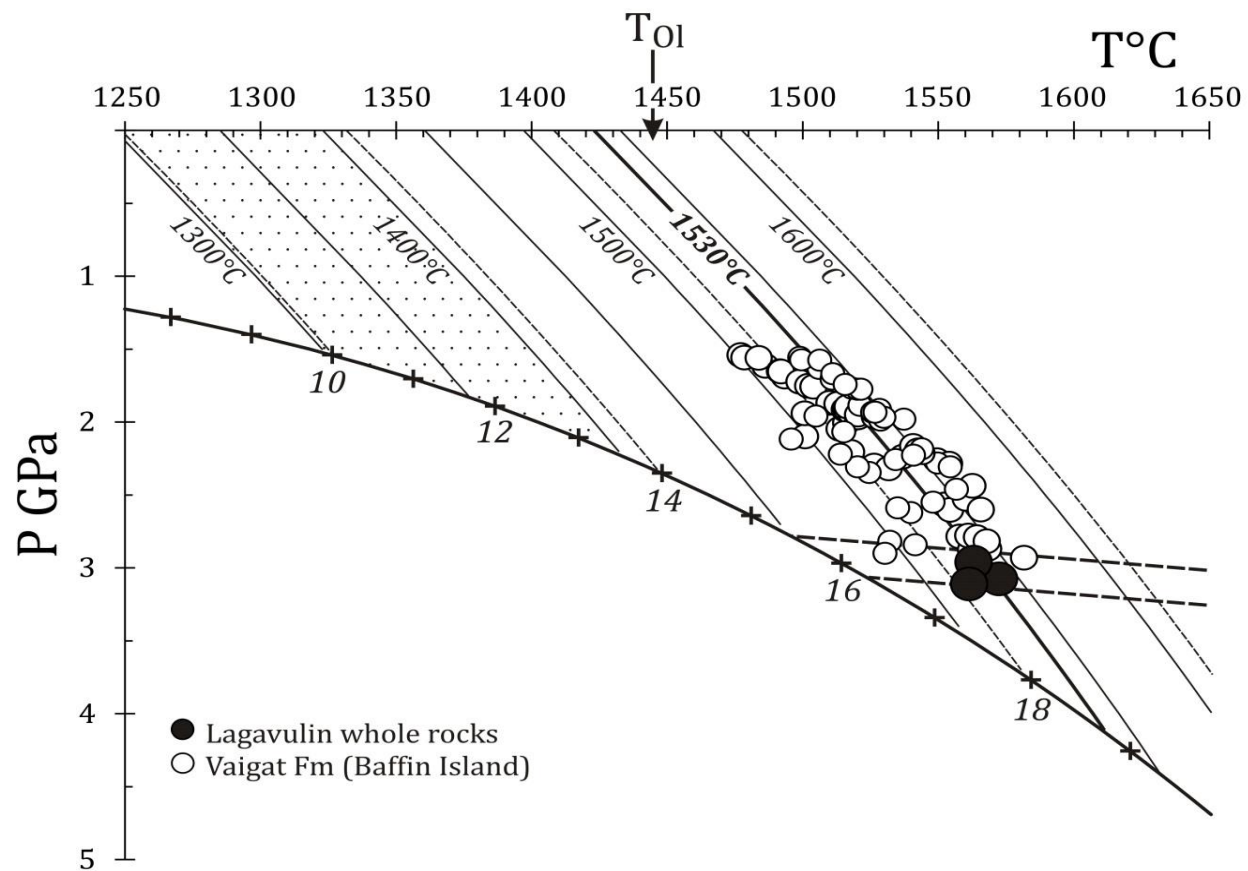

Inferred temperature-pressure conditions at which fractional melting terminated for calculated primary magmas. The shaded region along adiabat encompasses magmas derived from mantle of ambient  $T_p$ . Adiabatic melting paths are labelled with mantle potential temperature.  $T_{OI}$  is an independent estimate of the equilibration temperature of olivine using the method of Putirka et al (2007). Pecked lines are garnet-in and spinel-out with increasing pressure respectively. The diagrams were constructed following the methods of Herzberg and Gazel (2019) and Hole (2015) and data for Baffin Island is from Hole (2015).
